1 Research paper

2

3 An early-morning flowering trait in rice helps retain grain yield under heat stress field  
4 conditions at flowering stage

5

6 Tsutomu Ishimaru<sup>1,2,3</sup>, Khin Thandar Hlaing<sup>4</sup>, Ye Min Oo<sup>4</sup>, Tin Mg Lwin<sup>4</sup>, Kazuhiro  
7 Sasaki<sup>1</sup>, Patrick D. Lumanglas<sup>2</sup>, Eliza-Vie M. Simon<sup>2</sup>, Tin Tin Myint<sup>5</sup>, Aris Hairmansis<sup>6</sup>,  
8 Untung Susanto<sup>6</sup>, Bharathi Ayyenar<sup>7</sup>, Raveendran Muthurajan<sup>7</sup>, Hideyuki Hirabayashi<sup>8</sup>,  
9 Yoshimichi Fukuta<sup>9</sup>, Kazuhiro Kobayasi<sup>10</sup>, Tsutomu Matsui<sup>11</sup>, Mayumi Yoshimoto<sup>12</sup>,  
10 Than Myint Htun<sup>4</sup>

11

12 <sup>1</sup> Japan International Research Center for Agricultural Sciences (JIRCAS), 1-1  
13 Ohwashi, Tsukuba, Ibaraki 305-8686, Japan

14 <sup>2</sup> International Rice Research Institute (IRRI), DAPO Box 7777, Metro Manila, the  
15 Philippines

16 <sup>3</sup> Hokuriku Research Station, Central Region Agricultural Research Center, National  
17 Agriculture and Food Research Organization (CARC/NARO), Inada, Joetsu, Niigata  
18 941-0193, Japan

19 <sup>4</sup> Division of New Genetics, Yezin Agricultural University (YAU), Nay Pyi Taw 15013,  
20 Myanmar

21 <sup>5</sup> Department of Agricultural Research (DAR), Yezin, Nay Pyi Taw 095-067, Myanmar

22 <sup>6</sup> Indonesian Center for Rice Research (ICRR), Street 9th Sukamandi, Subang, West  
23 Java, Indonesia

24 <sup>7</sup> Department of Plant Biotechnology, Tamil Nadu Agricultural University, Coimbatore  
25 641003, India

26 <sup>8</sup> Institute of Crop Science, NARO, 2-1-18 Kannondai, Tsukuba, Ibaraki 305-8518,  
27 Japan

28 <sup>9</sup> Tropical Agriculture Research Front (TARF), Japan International Research Center for  
29 Agricultural Sciences (JIRCAS), 1091-1 Maezato-Kawabaru, Ishigaki, Okinawa  
30 907-0002, Japan

31 <sup>10</sup> Faculty of Life and Environmental Sciences, Shimane University, 1060

1 Nishikawatsu-cho, Matsue, Shimane 690-8504, Japan

2 <sup>11</sup> Faculty of Applied Biological Sciences, Gifu University, 1-1 Yanagido, Gifu, Gifu  
3 501-1193, Japan

4 <sup>12</sup> National Institute for Agro-Environmental Sciences (NIAES), NARO, 3-1-3  
5 Kannondai, Tsukuba, 305-8604, Japan

6

7 † Author for correspondence:

8 *Tsutomu Ishimaru*, Hokuriku Research Station, Central Region Agricultural Research  
9 Center, National Agriculture and Food Research Organization (CARC/NARO), 1-2-1  
10 Inada, Joetsu, Niigata 943-0193, Japan

11 *Tel.:* +81 25 526 3218, *Fax.:* +81 25 524 8578

12 *E-mail:* [cropman@affrc.go.jp](mailto:cropman@affrc.go.jp)

13

14 T. Ishimaru: [cropman@affrc.go.jp](mailto:cropman@affrc.go.jp)

15 K. T. Hlaing: [khinthandarhlaing44@gmail.com](mailto:khinthandarhlaing44@gmail.com)

16 Y. M. Oo: [agriman14@gmail.com](mailto:agriman14@gmail.com)

17 T. M. Lwin: [tmlyau2006@gmail.com](mailto:tmlyau2006@gmail.com)

18 K. Sasaki: [sasakiz@affrc.go.jp](mailto:sasakiz@affrc.go.jp)

19 P. D. Lumanglas: [patlumanglas@yahoo.com](mailto:patlumanglas@yahoo.com)

20 EV. M. Simon: [e.simon@irri.org](mailto:e.simon@irri.org)

21 Tin Tin Myint: [tintinm80@gmail.com](mailto:tintinm80@gmail.com)

22 A. Hairmansis: [a.hairmansis@gmail.com](mailto:a.hairmansis@gmail.com)

23 U. Susanto: [untungsus2011@gmail.com](mailto:untungsus2011@gmail.com)

24 B. Ayyenar: [bharathiayyenar@gmail.com](mailto:bharathiayyenar@gmail.com)

25 R. Muthurajan: [raveendrantnau@gmail.com](mailto:raveendrantnau@gmail.com)

26 H. Hirabayashi: [hiralin@affrc.go.jp](mailto:hiralin@affrc.go.jp)

27 Y. Fukuta: [zen@affrc.go.jp](mailto:zen@affrc.go.jp)

28 K. Kobayasi: [kobayasi@life.shimane-u.ac.jp](mailto:kobayasi@life.shimane-u.ac.jp)

29 T. Matsui: [matsuit@gifu-u.ac.jp](mailto:matsuit@gifu-u.ac.jp)

30 M. Yoshimoto: [yoshimot@affrc.go.jp](mailto:yoshimot@affrc.go.jp)

31 T. M. Htun: [than12htun@gmail.com](mailto:than12htun@gmail.com)

- 1
- 2 Date of submission: 17 January, 2021
- 3
- 4 **Word counts: 3085 words from Introduction to Conclusion**
- 5 Number of tables: 5
- 6 Number of figures: 3
- 7 Supplementary information: 4 tables
- 8
- 9 Running title: Heat escape by an early-morning flowering trait in rice
- 10 Ishimaru et al.

1 Abstract (199-words)

2

3 Early-morning flowering (EMF) trait is supposed to be effective in retaining grain yield  
4 due to mitigation of heat-induced spikelet sterility at flowering in rice. This study  
5 evaluated (i) phenotypic differences between a near-isogenic line carrying a QTL for  
6 EMF trait, designated as IR64+*qEMF3*, and a recurrent parent, IR64, under wide  
7 variation in climates and (ii) whether an EMF trait can retain grain yield under heat  
8 stress at flowering. IR64+*qEMF3* had significant earlier flower opening time (FOT) in  
9 diverse environmental conditions including temperate, subtropical, and tropical regions.  
10 Under normal temperatures at flowering, IR64+*qEMF3* had similar grain yield to IR64  
11 with some significant changes in agronomic traits and yield components. Field trials in  
12 heat-vulnerable regions of central Myanmar for seven crop seasons showed that higher  
13 percentage of filled grains contributed to the significantly higher grain yield in  
14 IR64+*qEMF3* among yield components when plants were exposed to daily maximum  
15 air temperatures around 36.5 °C or higher. Lower spikelet sterility in IR64+*qEMF3* was  
16 attributed to the earlier FOT during cooler early morning hours. This is the first field  
17 study that clearly demonstrates the advantage of the EMF trait for retaining grain yield  
18 by stabilizing percentage of fertile grains under heat stress at flowering.

1

2 Keywords: early-morning flowering; flower opening time; heat stress; percentage of  
3 filled grains; rice; yield-related traits

4

5 Abbreviations:

6 CARC/NARO; Central Region Agricultural Research Center, National Agriculture and

7 Food Research Organization

8 DAR; Department of Agricultural Research

9 EMF; early-morning flowering

10 FOT; flower opening time

11 ICRR; Indonesian Center for Rice Research

12 JIRCAS; Japan International Research Center for Agricultural Sciences

13 NIL; near-isogenic line

14 PFG; percentage of filled grains

15 PN; panicle number per hill

16 SN; spikelet number per panicle

17 TNAU; Tamil Nadu Agricultural University

18 YAU; Yezin Agricultural University

1 1000GW; one thousand grain weight

1    **Introduction**

2

3           Rice (*Oryza sativa* L.) is one of the most important staples feeding half the  
4 world's population (Carriger and Vallee, 2007). While there is a need to produce more  
5 rice in order to feed the increasing population, challenges for increasing rice production  
6 have been rising due to progressive global warming (IPCC, 2013). Consequently,  
7 development of climate-smart rice cultivars is a pressing issue today. Genetic  
8 improvement of heat-resilience is one of the key requirements for enhancing global food  
9 security to tackle the increasing episodes of heat stress damage on crop production.

10           Major cereal crops show extreme sensitivity to heat during anthesis (Prasad et  
11 al., 2017). Chamber experiments conducted previously revealed that high proportion of  
12 sterility occurs in rice when spikelets are exposed to temperatures around 35 °C (Matsui  
13 et al. 1997; Satake and Yoshida, 1978) even for a short period of time (Jagadish et al.,  
14 2007). Actual increase in spikelet sterility by heat stress at flowering was reported in hot  
15 dry seasons of tropical and subtropical regions (Ishimaru et al., 2016; Matsushima et al.  
16 1982; Osada et al., 1973). Rice crop is considered to be already at critical limits of heat  
17 stress vulnerability in central Thailand and Myanmar in dry season (Wassmann et al.,  
18 2009). Prediction models have identified high risk areas for reduction in rice grain yield

1 by global warming in many rice-growing regions of Asia, mostly due to heat-induced  
2 spikelet sterility (See review, Horie, 2019). Central Myanmar has been projected as one  
3 among the heat-vulnerable regions for spikelet sterility and yield reduction in the future  
4 (Horie, 2019; Wassmann et al., 2009).

5         The EMF trait is proposed to be effective in escaping heat-induced spikelet  
6 sterility at flowering by shifting FOT to the cooler early morning times (Satake and  
7 Yoshida, 1978). Flower opening of modern cultivars predominantly occurs between  
8 3.5–5.5 hours after dawn in the natural conditions of tropics (Bheemanahalli et al.,  
9 2017; Hirabayashi et al., 2015). Under elevated high temperature greenhouse conditions,  
10 spikelets that flower at later hours tend to be sterile with higher proportion; hence,  
11 shifting flower opening time to the cooler early morning, even a one-hour advancement,  
12 is effective in mitigating heat-induced spikelet sterility at flowering (Ishimaru et al.,  
13 2010). We previously developed a near-isogenic line (NIL) carrying a QTL for EMF  
14 (*qEMF3*) derived from a wild rice, *O. officinalis*, in the genetic backgrounds of IR64  
15 (Hirabayashi et al., 2015). The NIL was designated as IR64+*qEMF3*. *qEMF3* advanced  
16 FOT by approximately 1.5–2.0 h in the tropical Philippines during both wet and dry  
17 seasons (Hirabayashi et al., 2015). Another field experiment also showed earlier FOT  
18 and lower sterility in IR64+*qEMF3* compared to a genetically diverse panel of



1 germplasm in the dry rice growing season in Tamil Nadu, India (Bheemanahalli et al.,  
2 2017). However, whether the EMF trait has yield advantage under different heat stress  
3 levels on the field during flowering is yet to be ascertained. Whether *qEMF3* itself  
4 influences grain yield and other phenotypes of IR64 under normal temperatures during  
5 flowering stage is still not clear.

6         This study consists of two major objectives: the first is to evaluate  
7 advancement of FOT, agronomic traits, and yield performance of IR64+*qEMF3* in a  
8 wide range of field environments, including temperate, subtropical, and tropical regions,  
9 under normal rice-growing temperatures at flowering, and the second objective is to  
10 investigate if the EMF trait in the field helps in retaining rice grain yield in the  
11 heat-vulnerable region of central Myanmar.

1 **Materials and Methods**

2

3 Crop establishment

4

5 IR64, an Indica group cultivar, and a BC<sub>3</sub>-derived NIL with IR64 genetic  
6 background, IR64+*qEMF3* (Hirabayashi et al., 2015), were used for all six experimental  
7 sites, which were located in the temperate (Joetsu, Niigata, Japan), subtropical (Ishigaki,  
8 Okinawa, Japan), and tropical (Nay Pyi Taw, Myanmar; Los Baños, Laguna,  
9 Philippines; Coimbatore, Tamil Nadu, India; Subang, West Java, Indonesia) regions  
10 across five countries (Table 1), following the local rice cultivation practices  
11 (Supplementary Table S1). Plants were grown in fields during the summer/dry season  
12 (Table 1). Note that two staggered sowings were employed in Nay Pyi Taw for 2017DS,  
13 2018DS, and 2019DS to expose rice plants to different temperatures at heading. 50%  
14 heading date was recorded for each genotype in each trial to determine the  
15 days-to-heading. Plant materials were kept healthy by spraying agrochemicals, when  
16 required.

17

18 Flower opening time, spikelet sterility, and monitoring of local air temperatures

1

2           Flowering pattern observation and data analysis for the time to reach the peak  
3 and end of flower opening (FOT50 and FOT90, respectively) was conducted following  
4 the method of Hirabayashi et al., (2015). Using four heading panicles per plot per day,  
5 opened spikelets were marked every 30 min by fine-tipped pens, and this flowering  
6 observation was continued for more than three days in all sites. FOT50 and FOT90 were  
7 calculated using the Koyomi Station software  
8 (<http://eco.mtk.nao.ac.jp/koyomi/index.html.en>) and R program (ver. 3.6.2). Note that  
9 FOT50 and FOT 90 were presented as time after dawn. On 22 April of 2018, on Crop 1  
10 in Nay Pyi Taw, opened spikelets were marked with different colored pens following the  
11 protocol of Ishimaru et al. (2010); spikelets opened before 0700H were marked with  
12 blue pens, those between 0700H-0830H with green pens, those between 0830H-1000H  
13 with purple pens, and those after 1000H with black pens. At maturity, marked spikelets  
14 marked with different colors were collected and sterility was physically checked. Air  
15 temperature during flowering was monitored by the meteorological station installed in  
16 each experimental site.

17

18 Agronomic traits, grain yield, and yield components

1

2           At maturity, agronomic traits such as plant height (from ground level to the tip  
3 of panicles), panicle length (from panicle neck to the tip of panicle), flag leaf length,  
4 and flag leaf width were measured using the longest tiller in a hill. Grain yield and yield  
5 components per plant were determined in Joetsu, Nay Pyi Taw, Los Baños, Coimbatore,  
6 and Subang. Note that only one replicate was designed in Subang, but 3–5 replicates in  
7 other sites (Supplementary Table S1). Subsamples were prepared for selecting filled  
8 grains by an air-blower or water method and for subsequent determination of one  
9 thousand grain weight (1000GW). Selection of filled grains for seven yield trials in Nay  
10 Pyi Taw was consistently conducted by water method. Grain yield and 1000 GW were  
11 expressed based on 14% moisture content. Grain length, width, and thickness were  
12 measured with a digital caliper (SINWA Sokutei, Sanjo, Niigata, Japan) using the grains  
13 harvested in Joetsu, Ishigaki, and Nay Pyi Taw.

14

15   Statistical analysis

16

17           Analysis of variance was tested by R program (ver. 3.6.2). Multiple regression  
18 analysis and *t*-test between genotypes were conducted by Microsoft Excel 2016.



1 **Results**

2

3 Flower opening time

4

5 Flowering pattern observation was conducted in Joetsu, Ishigaki, Nay Pyi Taw,  
6 Los Baños, and Subang under the condition that there was great variation in average  
7 daily maximum temperature during heading (Table 1; Supplementary Table 2). In Joetsu,  
8 Ishigaki, Los Baños, and Subang, FOT50 was significantly earlier in IR64+*qEMF3* than  
9 IR64 in each of the tested sites, ranging from 1.9 h to 3.5 h in IR64+*qEMF3* and 3.7 h to  
10 4.6 h in IR64 on the basis of time after dawn (Table 2). FOT90 was also significantly  
11 earlier in IR64+*qEMF3* than in IR64, ranging from 2.5 h to 4.0 h in IR64+*qEMF3* and  
12 4.2 h to 5.0 h in IR64 (Table 2). The genotype difference in the average of FOT50 and  
13 of FOT90 across locations was -1.5 h and -1.2 h, respectively (Table 2). In Nay Pyi  
14 Taw, flowering pattern observation conducted under a wide range of average daily  
15 maximum temperatures for seven crop seasons also showed significantly earlier FOT in  
16 IR64+*qEMF3* than IR64 (Supplementary Table 2).

17

18 Agronomic traits, grain yield, and yield components under normal temperatures at

1 flowering

2

3 Days-to-heading in IR64+*qEMF3* was the same as IR64 or up to five days  
4 longer than in IR64 (Tables 3, 4; Supplementary Table S3). Panicle length were not  
5 significantly different, while flag leaf length and flag leaf width were slightly larger in  
6 IR64+*qEMF3* (Table 3; Supplementary Table S3). Plant height was significantly higher  
7 in IR64+*qEMF3* than IR64 in Subang (Supplementary Table S3).

8

9 Grain yield and yield components under normal temperatures at flowering

10

11 Grain yield and yield components were further examined in Joetsu, Los Baños,  
12 Coimbatore, and Subang (Table 4; Supplementary Table S3), where average daily  
13 maximum temperatures at flowering was in the normal ranges below 35.5 °C (Table 1).  
14 Grain yield and panicle number per plant (PN) was not significantly different between  
15 IR64 and IR64+*qEMF3*, but spikelet number per panicle (SN) was significantly larger  
16 and 1000GW was significantly smaller in IR64+*qEMF3* (Table 4; Supplementary Table  
17 S3). Smaller 1000GW in IR64+*qEMF3* was mainly due to the smaller length and width  
18 of grains compared to IR64 grains (Supplementary Table S4). Percentages of filled

1 grains (PFG) was similar or slightly higher in IR64+*qEMF3* on an average, but the trend  
2 was not the same on all locations (Table 4; Supplementary Table S3).

3

4 Grain yield and yield components in heat-vulnerable regions of central Myanmar

5

6 Grain yield and yield components were evaluated in heat-vulnerable regions of  
7 central Myanmar for seven crop seasons across four years (Table 5). Average daily  
8 maximum temperatures during heading ranged from 35.0 °C to 38.3 °C (Table 5). Grain  
9 yield per plant was significantly higher in IR64+*qEMF3* than IR64, resulting in yield  
10 advantage of IR64+*qEMF3* by 22.4% over IR64 on an average. PN was similar between  
11 genotypes, while SN and 1000GW was significantly lower in IR64+*qEMF3* than in  
12 IR64. Such a trend in PN, SN, and 1000GW characters was similar in other locations as  
13 well, as shown in Table 4. Significant interaction between the genotype and  
14 environment was observed in PFG; difference in PFG between genotypes in each season  
15 ranged from 0.8% to 17.4%, and PFG was 9.3% higher in IR64+*qEMF3* than in IR64  
16 on an average (Table 5). Multiple regression analysis revealed a significant positive  
17 effect of PFG on yield advantage of IR64+*qEMF3*, while other parameters such as PN,  
18 SN and 1000GW did not have a significant effect (Figure 1). The relationship between



1 PFG and average daily maximum temperatures during heading is plotted in Figure 2.  
2 Difference in PFG between genotypes was small when average daily maximum  
3 temperatures during heading was below 36.5 °C. PFG steadily decreased in IR64 when  
4 average daily maximum temperatures during heading was greater than 36.5 °C, and it  
5 sharply dropped to 65.6% at 37.9 °C (Figure 2). On the contrary, PFG was stable at the  
6 high level of around 90% until 37 °C and gradually decreased to 83.0% at 38.3 °C in  
7 IR64+*qEMF3* (Figure 2).  
8 Spikelet sterility was examined in different time periods of flower opening (Figure 3).  
9 During flowering pattern observation (recorded with different colored pens), air  
10 temperature steadily increased from 25.8 °C at 0700H to 30.0 °C at 0930H, and up to  
11 34.0 °C at noon (Figure 3A). Under such air temperature condition, flower opening in  
12 IR64+*qEMF3* started after 0730H, peaked at 0900H, and almost ended by 0930H  
13 (Figure 3A). On the other hand, flower opening in IR64 started after 0830H, peaked at  
14 0930H, and ended by 1030H (Figure 3A). Spikelet sterility in each time period was  
15 3.2% and 8.6% for spikelets that flowered during 0700-0830H (green-lined bar) and  
16 during 0830-1000H (purple-lined bar), respectively, in IR64+*qEMF3* (Figure 3B). On  
17 the other hand, spikelet sterility was 10.2% and 47.2% for spikelets flowered during  
18 0830-1000H (purple bar) and after 1000H (black bar), respectively, in IR64 (Figure 3B).

- 1 As a consequence, spikelet sterility was 17.0% and 8.9% in IR64 and IR64+*qEMF3*,
- 2 respectively, on that single day (Figure 3B).

1 **Discussion**

2

3 *Significant advancement of FOT by qEMF3 in a wide range of environmental*  
4 *conditions*

5

6 Hirabayashi et al., (2015) and Bheemanahalli et al., (2017) previously reported  
7 an earlier FOT in IR64+*qEMF3* than IR64 in Philippines (dry and wet seasons) and  
8 southern India (dry season), under field conditions. This study validated the genetic gain  
9 in advancing FOT by *qEMF3* under diverse environments including temperate to  
10 tropical climates in the genetic background of IR64 (Table 2; Supplementary Table S2).

11 It should be noted, however, that the difference in FOT between IR64 and IR64+*qEMF3*  
12 varies depending on the experimental site or seasons tested (Table 2; Supplementary  
13 Table S2). It is possible that this difference is because FOT is determined in the fields  
14 by microclimates such as solar radiation and vapor pressure deficit in addition to air  
15 temperature (Julia and Dingkuhn, 2012; Kobayasi et al., 2010). Development of a  
16 prediction model for FOT that takes into consideration various such meteorological  
17 parameters will help us in identifying the locations where *qEMF3* can make a  
18 significant advancement in FOT to escape heat stress at flowering. The nature of

1 interactions between genetic and environmental factors on FOT in IR64+*qEMF3* is still  
2 not very clear.

3

4 *qEMF3 helps retain grain yield by stabilizing percentage of filled grains under heat*  
5 *stress at flowering*

6

7 Central Myanmar is projected as one of the heat-vulnerable regions for spikelet  
8 sterility and yield reduction in the future (Horie, 2019; Wassmann et al., 2009). By  
9 employing staggered sowings in different dry seasons, wide range of average daily  
10 maximum temperatures during heading was obtained (Table 5). IR64+*qEMF3* was  
11 tested under such field conditions to examine if an EMF trait could mitigate the yield  
12 loss under heat stress at flowering.

13 PFG was similar between genotypes or slightly higher in IR64+*qEMF3* under  
14 normal temperature at flowering (Table 4; Supplementary Table S3), whereas a total of  
15 seven trials in the central Myanmar revealed that PFG greatly varied depending on the  
16 seasons (Table 5). Genetic and environmental interaction were not observed in other  
17 yield components such as PN, SN, and 1000GW (Table 5). A clear difference in  
18 response of PFG to average daily maximum temperature at heading between genotypes

1 was observed (Figure 2). PFG steadily dropped in IR64 as average daily maximum  
2 temperature at heading increased above 36.5 °C (Figure 2). On the other hand, high PFG  
3 of greater than 80% was maintained in IR64+*qEMF3* even when average daily  
4 maximum temperature at heading was around 38 °C (Figure 2). Among yield  
5 components, PFG was the only parameter that significantly contributed to the yield  
6 advantage of IR64+*qEMF3* (Figure 1). Flowering pattern observation revealed less  
7 frequency of spikelet sterility in IR64+*qEMF3* than in IR64 on a single day due to the  
8 earlier FOT in IR64+*qEMF3* (Figure 3A, 3B). These results indicate the yield advantage  
9 that *qEMF3* conferred under high temperature conditions at heading by significant  
10 advancement of FOT in IR64 genetic background. Notably, an approximately one-hour  
11 difference in FOT50 and FOT 90 in Crop 1 of 2018 (Supplementary Table S2) made a  
12 difference in spikelet sterility between IR64 and IR64+*qEMF3* (Figure 3B), supporting  
13 that one-hour advancement of FOT is sufficient to avoid heat-induced spikelet sterility  
14 as shown in previous chamber experiments (Ishimaru et al. 2010; Satake and Yoshida  
15 1978).

16 Horie (2019) documented that EMF is one of the key traits that could retain rice grain  
17 yield by mitigating heat-induced spikelet sterility during flowering under future hotter  
18 temperatures in inland of continental South East Asia. Our study clearly demonstrated

1 that EMF trait could diminish heat stress damage at flowering on grain yield through  
2 stabilization of PFG in the hot dry season of central Myanmar. IR64 is a moderately  
3 heat-tolerant cultivar (Shi et al., 2015). Some of Myanmar cultivars could be reaching  
4 critical limits of heat tolerance as described by Wassmann et al., (2009). Assessment of  
5 heat tolerance among Myanmar local cultivars helps to identify the target cultivars to be  
6 conferred with EMF trait. Heat-vulnerable regions, in terms of heat-induced spikelet  
7 sterility, are estimated to be located in different geographic locations including China,  
8 South-East Asia, South Asia, and West Africa (Laborte et al., 2012). Since  
9 IR64+*qEMF3* can significantly advance FOT in diverse environmental conditions  
10 (Table 2; Supplementary Table S2), *qEMF3* may potentially minimize reduction in  
11 heat-induced spikelet sterility across regions. It should be noted, however, microclimate  
12 including humidity (Matsui et al., 2014; Tian et al., 2011), wind velocity (Ishimaru et al.,  
13 2012; Matsui et al., 1997), and solar radiation (Ishimaru et al., 2016), which are not  
14 inclusive in analysis in the present study, have a complex interaction effect on spikelet  
15 sterility under field heat stress through changes in panicle temperature (Yoshimoto et al.,  
16 2011). Whether IR64+*qEMF3* can mitigate yield loss in other heat-vulnerable regions  
17 with different microclimate needs to be further tested.

18

1 *Further breeding efforts for the genetic improvement of IR64+qEMF3 and other*  
2 *backgrounds*

3

4         Some yield components were significantly different between genotypes. SN  
5 tended to be higher while 1000GW was lower in IR64+*qEMF3* than in IR64 (Table 4, 5;  
6 Supplementary Table S3). However, PN was not different between genotypes (Table 4;  
7 Supplementary Table S3). IR64+*qEMF3* had larger flag leaf size compared to IR64  
8 (Table 3; Supplementary Table S3). Smaller 1000GW in IR64+*qEMF3* was mainly due  
9 to the smaller length of the grains (Supplementary Table S4). These results suggest that  
10 physical constraints due to small husk size, and not insufficient source supply, would be  
11 responsible for the smaller 1000GW observed. Ohsumi et al., (2011) demonstrated that  
12 there is a negative correlation between spikelet number per panicles and 1000GW using  
13 NILs for increased spikelet number. Whether *qEMF3* has pleiotropic effects on SN and  
14 1000GW as well as the EMF trait must be further investigated. Introgression of QTL for  
15 grain size detected in genetic background of Indica group cultivars (Kato et al., 2011;  
16 Qing et al., 2018) may retrieve 1000 GW of IR64+*qEMF3* to similar levels as those of  
17 IR64. Regarding other agronomic traits, minor change in days-to-heading were  
18 observed (Table 3, 5; Supplementary Table S3). IR64 is a popular Indica group cultivar

1 that is most widely grown in Asia (Brennan and Malabayabas, 2011) and its progeny  
2 continues to be grown quite widely. Our study provides breeders some fundamental  
3 information on the changes in plant phenotypes that can occur due to the introgression  
4 of *qEMF3* to IR64 genetic background. Transfer of *qEMF3* to popular cultivars in the  
5 temperate, subtropical, and tropical regions by marker-assisted breeding is an ongoing  
6 project. The effects of *qEMF3* on agronomic traits and grain yield on other genetic  
7 backgrounds need to be further investigated.



1 **Conclusion**

2

3           This is the first field study to clearly demonstrate that the EMF trait can retain  
4 rice grain yield through stabilization of PFG under stressful conditions in  
5 heat-vulnerable regions. Significant advancement of FOT due to *qEMF3* was observed  
6 in wide range of environments including temperate, subtropical, and tropical regions,  
7 while the changes in agronomic traits due to the introgression of *qEMF3* into genetic  
8 background of IR64 were minimal. This result indicates the possibility that *qEMF3* can  
9 also be effective in retaining rice grain yield in other heat-vulnerable regions and  
10 genetic backgrounds. A breeding program to transfer *qEMF3* to local cultivars grown in  
11 hot dry seasons through marker-assisted selection is an appropriate strategy that is  
12 recommended.

1 **Supplementary data**

2

3 Supplementary Table S1 Experimental design and fertilizer conditions in each  
4 experimental site.

5 <sup>a</sup>The experimental plots were arranged in a randomized complete block design in Joetsu,  
6 Los Baños, Nay Pyi Taw, and Coimbatore.

7 <sup>b</sup> 60 panicles that were randomly chosen from the bulk of panicles were used for the  
8 determination of yield and yield components.

9

10 Supplementary Table S2 Time to reach the peak (FOT50) and end (FOT90) of flower  
11 opening in Nay Pyi Taw.

12 \*\*\*Significant at 0.1% level by ANOVA.

13 Dates of observation were 3–6 April in Crop 1 of 2015, 28–30 April and 1 May in Crop  
14 1 of 2017, 16–19 May in Crop 2 of 2017, 21–24 April in Crop 1 of 2018, 16–19 May  
15 12–14 in Crop 2 of 2018, 4–7 April for IR64 and 8–11 April for IR64+*qEMF3* in Crop 1  
16 of 2019, and 3–6 May for IR64 and 8–11 May for IR64+*qEMF3* in Crop 2 of 2019.

17 FOT50 and FOT90 are expressed as hours after dawn. Average of maximum  
18 temperature during heading is shown in Table 5.

19

20 Supplementary Table S3 Agronomic traits (upper), yield, and yield components (lower)  
21 of IR64 and IR64+*qEMF3* in Subang.

22 Measurement was conducted by individual 14 plants except for Days to heading.

23 †, \*\*, \*\*\* Significant at the 10%, 1%, and 0.1% level, respectively, by *t*-test.

24

25 Supplementary Table S4 Physical dimensions of the grain in IR64 and IR64+*qEMF3*.

26 <sup>a</sup> Measurement in Nay Pyi Taw was done using grains harvested in Crop 1 of 2019.

1 **Acknowledgements**

2

3 We thank research technicians who were in charge of field management in each  
4 experimental site. Meteorological data in Ishigaki and Los Baños was provided by Dr. S.  
5 Goto and Dr. K. Okamoto (TARF/JIRCAS), and IRRI Climate Unit, respectively. T.I.  
6 thanks Dr. K.S.V. Jagadish (Kansas State University) and Dr. M. Okamura for critical  
7 reading of the manuscript and advice in statistical analysis, respectively. This work was  
8 supported by the Japanese government under the IRRI-Japan Collaborative Research  
9 Project (to T. I.), by grant-in-aid from the Ministry of Education, Culture, Sports,  
10 Science and Technology of Japan (No.26257410 to T. M., K. K., and T. I.), and Global  
11 Environment Research Coordination System organized by Ministry of Environment (To  
12 M. Y. and T. I.).

1   **References**

2

3   **Bheemanahalli R, Sathishraj R, Manoharan M, et al.** 2017. Is early morning  
4   flowering an effective trait to minimize heat stress damage during flowering in rice?  
5   Field Crops Research 203, 238-242.

6

7   **Brennan JP, Malabayabas A.** 2011. International Research Institute's Contribution to  
8   Rice Varietal Yield Improvement in South-East Asia. ACIAR Impact Assessment  
9   Series Report No. 74. Australian Centre for International Agriculture Research,  
10   Camberra, pp 111.

11

12   **Carriger S, Vallee D.** 2007. More crop per drop. Rice Today 6, 10–13.

13

14   **Hirabayashi H, Sasaki K, Kambe T, et al.** 2015. *qEMF3*, a novel QTL for the  
15   early-morning flowering trait from wild rice, *Oryza officinalis*, to mitigate heat stress  
16   damage at flowering in rice, *O. sativa*. Journal of Experimental Botany 66, 1227-1236.

17

18   **Horie T.** 2019. Global warming and rice production in Asia: Modeling, impact  
19   prediction and adaptation. Proceedings of the Japan Academy Series B 95, 211-245.

20

21   **IPCC.** 2013. Climate Change 2013: The physical science basis. Fifth Assessment  
22   Report, Working Group I. Summary for Policymakers.

23

24   **Ishimaru T, Hirabayashi H, Ida M, et al.** 2010. A genetic resource for early-morning  
25   flowering trait of wild rice *Oryza officinalis* to mitigate high-temperature-induced  
26   spikelet sterility at anthesis. Annals of Botany 106, 515-520.

27

28   **Ishimaru T, Hirabayashi H, Kuwagata T, Ogawa T, Kondo M.** 2012. The  
29   early-morning flowering trait of rice reduces spikelet sterility under windy and elevated  
30   temperature conditions at anthesis. Plant Production Science 15, 19-22.

31

- 1 **Ishimaru T, Seefong X, Nallathambi J, et al.** 2016. Quantifying rice spikelet sterility in  
2 potential heat-vulnerable regions: Field surveys in Laos and southern India. *Field Crops*  
3 *Research* 190, 3-9.
- 4
- 5 **Jagadish SVK, Craufurd PQ, Wheeler TR.** 2007. High temperature stress and  
6 spikelet fertility in rice (*Oryza sativa* L.). *Journal of Experimental Botany* 58,  
7 1627-1635.
- 8
- 9 **Julia C, Dingkuhn M.** 2012. Variation in time of day of anthesis in rice in different  
10 climatic environments. *European Journal of Agronomy* 43, 166-174.
- 11
- 12 **Kato T, Segami S, Toriyama M, et al.** 2011. Detection of QTLs for grain length from  
13 large grain rice. *Breeding Science* 61, 269-274.
- 14
- 15 **Kobayasi K, Matsui T, Yoshimoto M, Hasegawa T.** 2010. Effects of temperature,  
16 solar radiation, and vapor-pressure deficit on flower opening time in rice. *Plant*  
17 *Production Science* 13, 21-28.
- 18
- 19 **Laborte A, Nelson A, Jagadish SVK, Aunario J, Sparks A, Ye C, Redoña E.** 2012.  
20 Rice feels the heat. *Rice Today*, July-September, 30-31.
- 21
- 22 **Matsui T, Kobayasi K, Nakagawa H, Yoshimoto M, Hasegawa T, Reinke R, Angus**  
23 **J.** 2014. Lower-than-expected floret sterility of rice under extremely hot condition in a  
24 flood-irrigated field in New South Wales, Australia. *Plant Production Science* 17,  
25 245-252.
- 26
- 27 **Matsui T, Omasa K, Horie T.** 1997. High temperature-induced spikelet sterility of  
28 Japonica rice at flowering in relation to air temperature, humidity and wind velocity  
29 conditions. *Japanese Journal of Crop Science* 66, 449-455.
- 30
- 31 **Matsushima S, Ikewada H, Maeda A, Honma S, Niki H.** 1982. Studies on rice

1 cultivation in the tropics. 1. Yielding and ripening responses of the rice plant to the  
2 extremely hot and dry climate in Sudan. Japanese Journal of Tropical Agriculture 26,  
3 19–25.

4

5 **Ohsumi A, Takai T, Ida M, Yamamoto T, Sanoh-Arai Y, Yano M, Ando T, Kondo**  
6 **M.** 2011. Evaluation of yield performance in rice near-isogenic lines with increased  
7 spikelet number. Field Crops Research 120, 68–75.

8

9 **Osada A, Sasiprapa V, Rahong M, Dhammanuvong S, Chakrabandhu H.** 1973.  
10 Abnormal occurrence of empty grains of indica rice plants in the dry, hot season in  
11 Thailand. Proceedings of Crop Science Society of Japan 42, 103–109.

12

13 **Prasad PVV, Bheemanahalli R, Jagadish SVK.** 2017. Field crops and the fear of heat  
14 stress-Opportunities, challenges and future directions. Field Crops Research 200,  
15 114–121.

16

17 **Qing Y, Cheng P, Cheng Y, Feng Y, Huang D, Huang T, Song X, Ying J.** 2018.  
18 QTL-seq identified a major QTL for grain length and weight in rice using near isogenic  
19 F<sub>2</sub> population. Rice Science 25, 121-131.

20

21 **Satake T, Yoshida S.** 1978. High temperature induced sterility in Indica rice at  
22 flowering. Japanese Journal of Crop Science 47, 6-17.

23

24 **Shi W, Ishimaru T, Gannaban RB, Oane W, Jagadish SVK.** 2015. Popular rice  
25 (*Oryza sativa* L.) cultivars show contrasting responses to heat stress at gametogenesis  
26 and anthesis. Crop Science 55, 589-596.

27

28 **Tian X, Matsui T, Li S, Yoshimoto M, Kobayasi K, Hasegawa T.** 2010. Heat-induced  
29 floret sterility of hybrid rice (*Oryza sativa* L.) cultivars under humid and low wind  
30 conditions in the field of Jiangnan basin, China. Plant Production Science 13, 243-251

31

- 1 **Wassmann R, Jagadish SVK, Heuer S, Ismail A, Redoña E, Serraj R, Singh RK,**  
2 **Howell G, Pathak H, Sumfleth K.** 2009. Climate change affecting rice production: the  
3 physiological and agronomic basis for possible adaptation strategies. *Advances in*  
4 *Agronomy* 101, 59-122.  
5  
6 **Yoshimoto M, Fukuoka M, Hasegawa T, Utsumi M, Ishigooka Y, Kuwagata T.** 2011.  
7 Integrated micrometeorology model for panicle and canopy temperature (IM<sup>2</sup>PACT) for  
8 rice heat stress studies under climate change. *Journal of Agricultural Meteorology* 67,  
9 233-247.

Table 1 Geographical location of experimental sites and growth season(s).

| Experimental site                    | Geographical location | Above sea level (m) | Season(s) of experiment (summer/dry season)                     | Average daily maximum temperature during heading (°C) <sup>b</sup> |                        |
|--------------------------------------|-----------------------|---------------------|-----------------------------------------------------------------|--------------------------------------------------------------------|------------------------|
|                                      |                       |                     |                                                                 | IR64                                                               | IR64+ <i>qEMF3</i>     |
| CARC/NARO, Joetsu, Niigata, Japan    | 37°1'N, 138°2'E       | 10                  | 2016                                                            | 29.5                                                               | 30.8                   |
| JIRCAS, Ishigaki, Okinawa, Japan     | 24°4'N, 124°2'E       | 27                  | 2015                                                            | 32.8                                                               | 33.1                   |
| YAU, Nay Pyi Taw, Myanmar            | 19°8'N, 96°3'E        | 98                  | 2015, 2017 <sup>a</sup> , 2018 <sup>a</sup> , 2019 <sup>a</sup> | 35.0-37.9 <sup>c</sup>                                             | 35.0-38.3 <sup>c</sup> |
| IRRI, Los Baños, Laguna, Philippines | 14°1'N, 121°2'E       | 22                  | 2014                                                            | 29.6                                                               | 27.7                   |
| TNAU, Coimbatore, Tamil Nadu, India  | 11°0'N, 76°5'E        | 426                 | 2020                                                            | 34.4                                                               | 35.5                   |
| ICRR, Subang, West Java, Indonesia   | 6°4'S, 107°6'E        | 26                  | 2015                                                            | 32.2                                                               | 32.2                   |

<sup>a</sup>Two staggered sowings were employed in each dry season.

<sup>b</sup>Average daily maximum temperature during heading was calculated for six days around 50% heading date. 50% heading date was positioned as third day of six days.

<sup>c</sup>Average daily maximum temperature during heading in each season and genotype is indicated in Table 5.



Table 2 Time to reach the peak (FOT50) and end (FOT90) of flower opening in Joetsu, Ishigaki, Los Baños, and Subang.

| Experimental site | FOT50               |                    | FOT90 |                    |     |
|-------------------|---------------------|--------------------|-------|--------------------|-----|
|                   | IR64                | IR64+ <i>qEMF3</i> | IR64  | IR64+ <i>qEMF3</i> |     |
| Joetsu            | 4.6                 | 3.2                | 5.0   | 4.0                |     |
| Ishigaki          | 3.7                 | 2.5                | 4.2   | 3.3                |     |
| Los Baños         | 4.4                 | 1.9                | 4.8   | 2.5                |     |
| Subang            | 4.3                 | 3.5                | 4.8   | 4.0                |     |
| ANOVA             | Genotype (G)        |                    | ***   |                    |     |
|                   | Location (E)        |                    | ***   |                    |     |
|                   | G × E               |                    | **    |                    |     |
|                   | Average of genotype |                    | 4.3   | 2.8                | 4.7 |

\*\*, \*\*\* Significant at the 1%, and 0.1% level by ANOVA, respectively.

Dates of observation were 12–14 August 2016 in Joetsu, 23–26 June 2015 in Ishigaki, 19, 20, 23 February 2014 in Los Baños, 19–23 August 2015 in Subang.

FOT and FOT90 are expressed as hours after dawn.

Table 3 Agronomic traits of IR64 and IR64+*qEMF3* in Joetsu, Nay Pyi Taw, Los Baños, and Coimbatore.

| Experimental site        | Days to heading     |                       | Plant height (cm) |                       | Panicle length (cm) |                       | Flag leaf length (cm) |                       | Flag leaf width (cm) |                       |      |
|--------------------------|---------------------|-----------------------|-------------------|-----------------------|---------------------|-----------------------|-----------------------|-----------------------|----------------------|-----------------------|------|
|                          | IR64                | IR64<br><i>+qEMF3</i> | IR64              | IR64<br><i>+qEMF3</i> | IR64                | IR64<br><i>+qEMF3</i> | IR64                  | IR64<br><i>+qEMF3</i> | IR64                 | IR64<br><i>+qEMF3</i> |      |
| Joetsu                   | 109                 | 111 <sup>b</sup>      | 99.3              | 99.9                  | 23.9                | 23.2                  | 21.7                  | 21.0                  | 1.25                 | 1.31                  |      |
| Nay Pyi Taw <sup>a</sup> | 101                 | 101 <sup>b</sup>      | 84.8              | 83.8                  | 23.5                | 22.8                  | 20.5                  | 21.1                  | 1.25                 | 1.28                  |      |
| Los Baños                | 82.6                | 86.4                  | 83.3              | 82.4                  | 22.8                | 22.1                  | 29.4                  | 30.8                  | 1.24                 | 1.28                  |      |
| Coimbatore               | 88.3                | 88.7                  | 85.2              | 85.7                  | 23.3                | 24.1                  | 23.1                  | 24.4                  | 1.06                 | 1.11                  |      |
| ANOVA                    | Genotype (G)        |                       | ns                |                       | ns                  |                       | †                     |                       | **                   |                       |      |
|                          | Location (E)        |                       | ***               |                       | ***                 |                       | ***                   |                       | ***                  |                       |      |
|                          | G × E               |                       | ns                |                       | †                   |                       | ns                    |                       | ns                   |                       |      |
|                          | Average of genotype |                       | 95.2              | 96.8                  | 88.2                | 88.0                  | 23.4                  | 23.1                  | 23.7                 | 24.3                  | 1.20 |

†, \*\*, \*\*\* Significant at the 10%, 1%, and 0.1% level, respectively, by ANOVA; ns: not significant.

<sup>a</sup>Measurement in Nay Pyi Taw was conducted in 2015DS.

<sup>b</sup>Days-to-heading data was taken only from one plot with intermediate days-to-heading for each genotype.

Table 4 Grain yield and yield components in IR64 and IR64+*qEMF3* at normal temperatures during heading.

| Experimental site | Grain yield<br>(g plant <sup>-1</sup> ) |                        | Panicle Number<br>(hill <sup>-1</sup> ) |                        | Spikelet number<br>(panicle <sup>-1</sup> ) |                        | Filled grains<br>(%) |                        | 1000GW<br>(g) |                        |      |      |
|-------------------|-----------------------------------------|------------------------|-----------------------------------------|------------------------|---------------------------------------------|------------------------|----------------------|------------------------|---------------|------------------------|------|------|
|                   | IR64                                    | IR64<br>+ <i>qEMF3</i> | IR64                                    | IR64<br>+ <i>qEMF3</i> | IR64                                        | IR64<br>+ <i>qEMF3</i> | IR64                 | IR64<br>+ <i>qEMF3</i> | IR64          | IR64<br>+ <i>qEMF3</i> |      |      |
|                   | Joetsu                                  | 38.6                   | 39.6                                    | 18.0                   | 18.5                                        | 95.5                   | 99.9                 | 75.6                   | 82.8          | 29.7                   | 25.9 |      |
| Los Baños         | 25.3                                    | 25.8                   | 13.8                                    | 12.7                   | 73.0                                        | 102.4                  | 91.5                 | 88.9                   | 27.5          | 22.7                   |      |      |
| Coimbatore        | 46.6                                    | 48.9                   | 19.3                                    | 20.0                   | 111.8                                       | 117.8                  | 86.7                 | 91.8                   | 24.2          | 22.2                   |      |      |
| ANOVA             | Genotype (G)                            |                        | ns                                      |                        | ***                                         |                        | **                   |                        | ***           |                        |      |      |
|                   | Location (E)                            |                        | ***                                     |                        | ***                                         |                        | ***                  |                        | ***           |                        |      |      |
|                   | G × E                                   |                        | ns                                      |                        | *                                           |                        | ***                  |                        | **            |                        |      |      |
|                   | Average of genotype                     |                        | 36.8                                    | 38.1                   | 17.0                                        | 17.1                   | 93.4                 | 106.7                  | 84.6          | 87.8                   | 27.1 | 23.6 |

\*, \*\*, \*\*\* Significant at the 5%, 1% and 0.1% level by ANOVA, respectively.

Yield and yield components in Nay Pyi Taw are shown in Table 5.

Table 5 Heading date, average of daily maximum temperature during heading, grain yield and yield components in IR64 and IR64+*qEMF3* in Nay Pyi Taw.

| Year  | Crop   | 50% heading date    |                       | Average daily maximum temperature during heading (°C) |                       | Grain yield (g plant <sup>-1</sup> ) |                       | Panicle number (plant <sup>-1</sup> ) |                       | Spikelet number (panicle <sup>-1</sup> ) |                       | Filled grains (%) |                       | 1000GW (g) |                       |
|-------|--------|---------------------|-----------------------|-------------------------------------------------------|-----------------------|--------------------------------------|-----------------------|---------------------------------------|-----------------------|------------------------------------------|-----------------------|-------------------|-----------------------|------------|-----------------------|
|       |        | IR64                | IR64<br><i>+qEMF3</i> | IR64                                                  | IR64<br><i>+qEMF3</i> | IR64                                 | IR64<br><i>+qEMF3</i> | IR64                                  | IR64<br><i>+qEMF3</i> | IR64                                     | IR64<br><i>+qEMF3</i> | IR64              | IR64<br><i>+qEMF3</i> | IR64       | IR64<br><i>+qEMF3</i> |
|       |        | 2015                | Crop 1                | 3 April                                               | 3 April               | 35.5                                 | 35.5                  | 24.9                                  | 28.5                  | 16.6                                     | 16.9                  | 67.3              | 84.5                  | 90.8       | 91.6                  |
| 2017  | Crop 1 | 1 May               | 2 May                 | 37.9                                                  | 38.3                  | 17.6                                 | 25.0                  | 14.0                                  | 14.3                  | 79.1                                     | 96.8                  | 65.6              | 83.0                  | 24.7       | 21.1                  |
| 2017  | Crop 2 | 18 May              | 19 May                | 37.1                                                  | 37.6                  | 25.0                                 | 29.7                  | 16.4                                  | 14.5                  | 104.2                                    | 116.0                 | 75.0              | 85.8                  | 23.6       | 20.8                  |
| 2018  | Crop 1 | 21 April            | 23 April              | 36.6                                                  | 36.5                  | 21.8                                 | 26.5                  | 13.8                                  | 14.0                  | 78.3                                     | 89.0                  | 83.4              | 94.1                  | 24.2       | 22.6                  |
| 2018  | Crop 2 | 18 May              | 18 May                | 35.0                                                  | 35.0                  | 22.8                                 | 24.7                  | 13.1                                  | 12.5                  | 81.3                                     | 85.7                  | 86.1              | 91.3                  | 25.1       | 25.3                  |
| 2019  | Crop 1 | 5 April             | 9 April               | 36.4                                                  | 36.9                  | 25.4                                 | 31.5                  | 18.0                                  | 19.6                  | 62.9                                     | 77.9                  | 85.0              | 92.9                  | 27.2       | 22.9                  |
| 2019  | Crop 2 | 4 May               | 9 May                 | 36.9                                                  | 37.9                  | 37.6                                 | 48.2                  | 28.2                                  | 30.2                  | 76.7                                     | 83.0                  | 76.2              | 88.2                  | 23.5       | 22.2                  |
| ANOVA |        | Genotype (G)        |                       | -                                                     | -                     | ***                                  |                       | ns                                    |                       | ***                                      |                       | ***               |                       | ***        |                       |
| ANOVA |        | Season (E)          |                       | -                                                     | -                     | ***                                  |                       | ***                                   |                       | ***                                      |                       | ***               |                       | ***        |                       |
| ANOVA |        | G × E               |                       | -                                                     | -                     | ns                                   |                       | ns                                    |                       | ns                                       |                       | **                |                       | ns         |                       |
| ANOVA |        | Average of genotype |                       | 36.5                                                  | 36.8                  | 25.0                                 | 30.6                  | 17.2                                  | 17.4                  | 78.5                                     | 90.4                  | 80.3              | 89.6                  | 24.7       | 22.4                  |

\*\* , \*\*\* Significant at 1% and 0.1% level by ANOVA, respectively.

## Figure legends

Figure 1 A diagram showing multiple regression of yield advantage in IR64+*qEMF3* on yield components, along with the correlation between explanatory variables for the data obtained in seven seasons of Nay Pyi Taw. Values with the single head arrows are standardized multiple regression coefficients. \*,  $P < 0.05$ ; ns, not significant.

Figure 2 Relationship between average daily maximum temperatures during heading and percentages of filled grains. Bars indicate means of percentages of filled grains  $\pm$  standard deviation.

Figure 3 Daily flowering pattern and change in air temperature (A), and changes in percentages of spikelet sterility in each time period and on a single day (B) on 22 April 2018. Bars shown in blue, green, purple, and black colors indicate that the spikelets opened before 0700H, between 0700H-0830H, 0830H-1000H, and after 1000H, respectively. In B, color bars for IR64 and white bars with color outline for IR64+*qEMF3* are shown.

Ishimaru et al. Figure 1

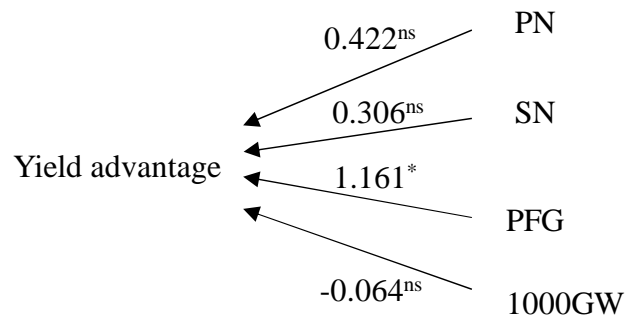

Ishimaru et al. Figure 2

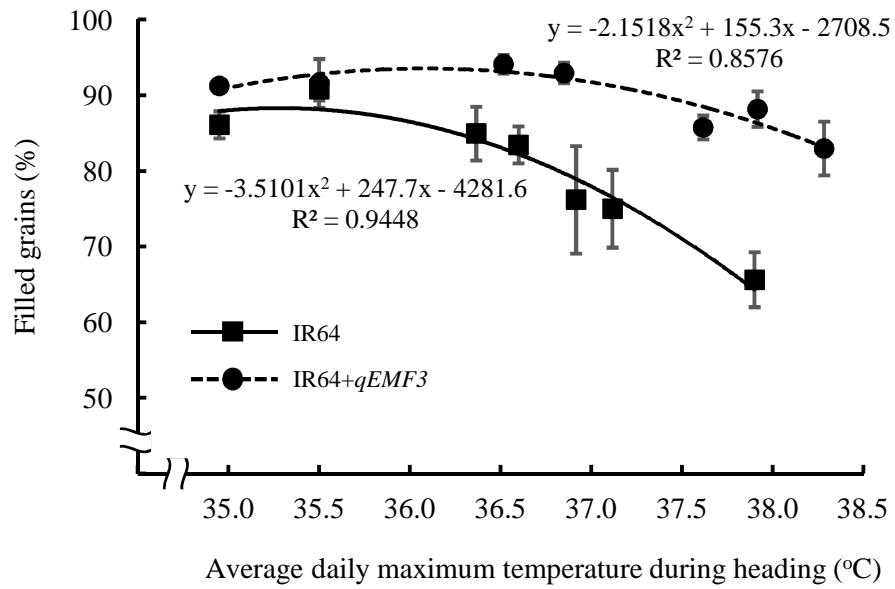

Ishimaru et al. Figure 3

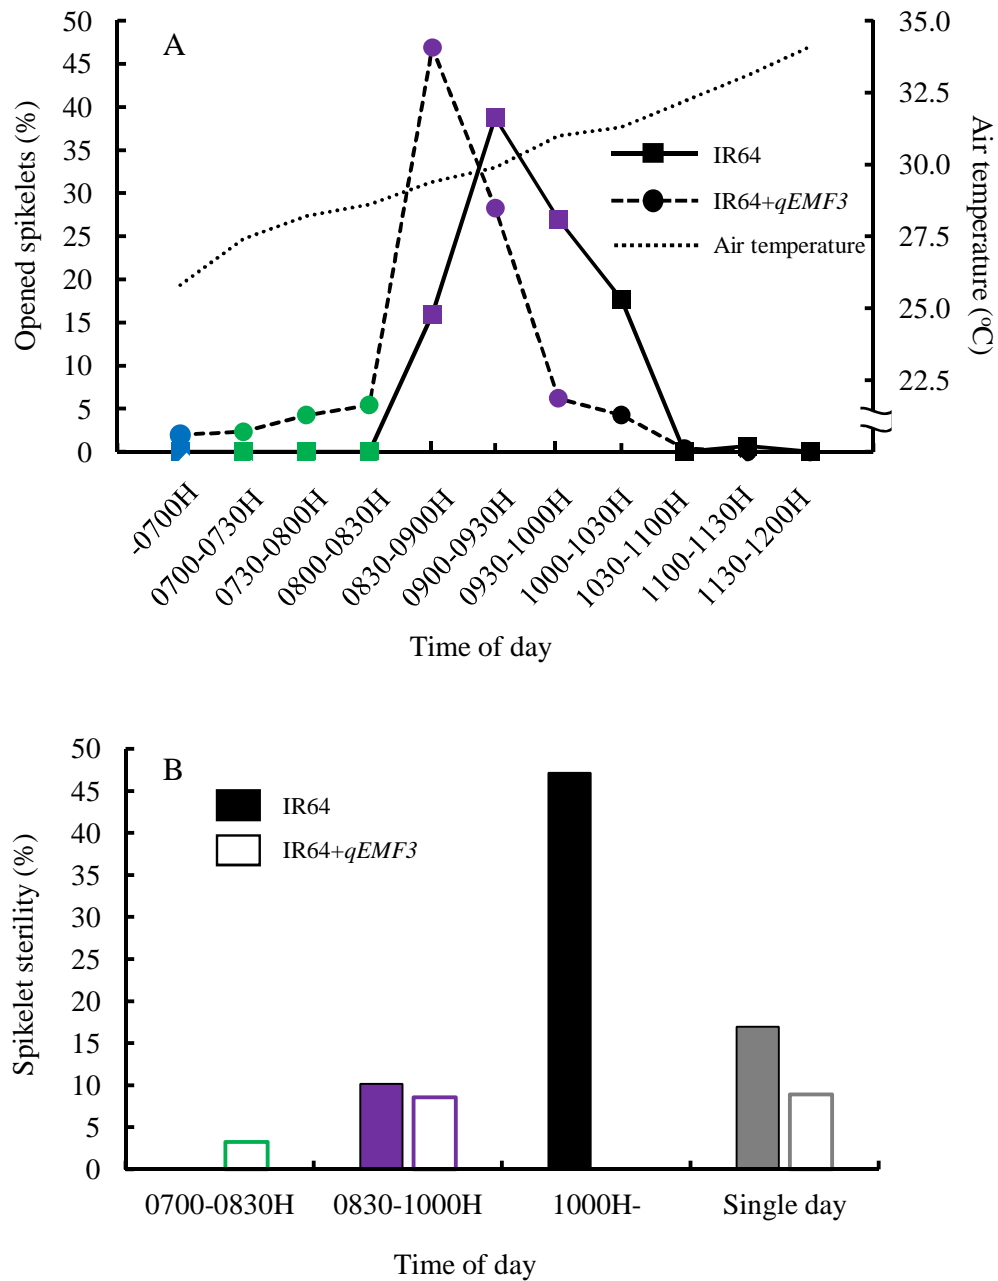

Source: https://www.biorxiv.org/content/10.1101/2021.01.16.426929v1.full.pdf
